# Supplementary material
Source: publisher figshare collection journal article supplement (https://acs.figshare.com/ndownloader/files/3875935)
Supplement: Supplementary file 1 [file 3875935]

## Supporting Information for

# **A Mathematical Model of Dynamic Behavior of Microbial Desalination Cells for Simultaneous Wastewater Treatment and Water Desalination**

Qingyun Ping <sup>†, #</sup>, Chenyao Zhang <sup>‡, #</sup>, Xueer Chen <sup>‡</sup>, Bo Zhang <sup>§</sup>, Zuyi Huang <sup>‡, \*</sup> and Zhen He <sup>†, \*</sup>

<sup>†</sup> *Department of Civil and Environmental Engineering, Virginia Polytechnic Institute and State University, Blacksburg, VA 24061, USA*

<sup>‡</sup> *Department of Chemical Engineering, Villanova University, Villanova, PA 19085, USA*

<sup>§</sup> *Key Laboratory of Environmental Biotechnology, Research Center for Eco-Environmental Sciences, Chinese Academy of Science, Beijing 100085, China*

<sup>#</sup> Equal contribution

<sup>\*</sup> Corresponding authors

Zuyi Huang: Phone (610) 519-4848, fax (610) 519-7354, email: [zuyi.huang@villanova.edu](mailto:zuyi.huang@villanova.edu)

Zhen He: Phone (540) 231-1346, fax (540) 231-7698, e-mail: [zhenhe@vt.edu](mailto:zhenhe@vt.edu)

Number of pages: 9

Number of figures: 4

Number of tables: 2

## Large MDC system setup and operation

The MDC system, consisting of 30 individual tubular MDCs hydraulically connected by the anolyte and the salt water, had a total anolyte volume of 60 L and a total desalination volume of 15 L, while the cathode compartment had a liquid volume of 30 L. Thus, the total liquid volume of the system was 105 L. The ratio between the anolyte and desalination volumes was 4:1, which was determined according to an MDC mathematical model that found that the desalination effectiveness was close to the highest at a ratio of 3-4 and further decreasing the ratio would have very minor increase in the desalination effectiveness. The individual MDC was built similarly to the one reported in a previous study.<sup>1</sup> A 1-m long carbon brush was inserted into the AEM tube as the anode electrode; before use, the carbon brush was pretreated according to a previous work.<sup>2</sup> The cathode electrode was carbon cloth coated with activated carbon powder (5 mg cm<sup>-2</sup>) as a cathode catalyst;<sup>3</sup> the carbon cloth wrapped the CEM tube and fixed with titanium wire.

The system was operated continuously at room temperature (~ 20 °C). The anodes of the MDCs were inoculated with the mixture of aerobic and anaerobic sludge from a wastewater treatment plant (Peppers Ferry, Radford, VA, USA). The synthetic wastewater containing glucose as a carbon source was prepared as (per L of tap water): glucose, 3000 mg L<sup>-1</sup>; NH<sub>4</sub>Cl, 0.15 g; NaCl, 0.5 g; MgSO<sub>4</sub>, 0.015 g; CaCl<sub>2</sub>, 0.02 g; KH<sub>2</sub>PO<sub>4</sub>, 0.53 g; K<sub>2</sub>HPO<sub>4</sub>, 1.07 g; yeast extract, 0.1 g; and trace element, 1 mL.<sup>4</sup> The salt solution was prepared by dissolving NaCl into tap water at a concentration of 35 g L<sup>-1</sup>, and fed into the desalination chambers of the MDCs as a single stream flowing through all the MDCs in series at a flow rate of HRT of 2 d. The anode and the cathode electrodes of each MDC were connected across an external resistor of 0.1  $\Omega$  to form an individual electrical circuit.

**Table S1.** Sensitivity measure of the top 10 ranked parameters

| Rank | Parameters  | Descriptions                                                    | Sensitivity measure |
|------|-------------|-----------------------------------------------------------------|---------------------|
| 1    | $k_r$       | Parameter in Eq.13 & 15                                         | 1                   |
| 2    | $d$         | Diffusion coefficient of salt in Eq. 13.                        | 0.045               |
| 3    | $V_{min}$   | Minimum $V_{oc}$                                                | 0.0067              |
| 4    | $R_{max}$   | Maximum internal resistance                                     | 0.0046              |
| 5    | $Y_M$       | Mediator yield in Eq.11                                         | 0.0038              |
| 6    | $k_{a,max}$ | Maximum microorganism growth rate in Eq. 9                      | 0.0038              |
| 7    | $C_a(0)$    | Initial concentration of anodophilic microorganism              | 0.0037              |
| 8    | $n$         | Electrons transferred per mol of mediator                       | 0.0017              |
| 9    | $C_{a,max}$ | Maximum attainable concentrations for anodophilic microorganism | 0.00028             |
| 10   | $M_{total}$ | Total mediator fraction                                         | 0.00014             |

**Table S2.** Parameters used in the model.

| Parameters    | Description                                                        | Values                                                           |
|---------------|--------------------------------------------------------------------|------------------------------------------------------------------|
| $k_{s,a,max}$ | Maximum substrate consumption rates by anodophilic microorganisms  | $5.32 \text{ mg-S} \cdot \text{mg-a}^{-1} \cdot \text{day}^{-1}$ |
| $k_{s,m,max}$ | Maximum substrate consumption rates by methanogenic microorganisms | $8.20 \text{ mg-S} \cdot \text{mg-a}^{-1} \cdot \text{day}^{-1}$ |
| $K_a$         | half-saturation concentrations for the anodophilic microorganism   | $20 \text{ mg-S} \cdot \text{L}^{-1}$                            |
| $K_m$         | half-saturation concentrations for the methanogenic microorganism  | $80 \text{ mg-S} \cdot \text{L}^{-1}$                            |
| $K_M$         | half-saturation concentrations for the redox mediator              | $0.2 * M_{total} \text{ mg-M} \cdot \text{mg-a}^{-1}$            |
| $k_{a,x}$     | the steepness factors for anodophilic microorganism                | $0.04 \text{ L} \cdot \text{mg-a}^{-1}$                          |
| $k_{m,x}$     | the steepness factors for methanogenic microorganism               | $0.04 \text{ L} \cdot \text{mg-m}^{-1}$                          |
| $C_{a,max}$   | maximum attainable concentrations for anodophilic microorganism    | $512.5 \text{ mg-a} \cdot \text{L}^{-1}$                         |
| $C_{m,max}$   | maximum attainable concentrations for methanogenic microorganism   | $525 \text{ mg-m} \cdot \text{L}^{-1}$                           |
| $k_{a,max}$   | maximum microorganism growth rates for anodophilic microorganism   | $0.197 \text{ day}^{-1}$                                         |
| $k_{m,max}$   | maximum microorganism growth rates for methanogenic microorganism  | $0.10 \text{ day}^{-1}$                                          |
| $M_{total}$   | Mediator fraction                                                  | $0.05 \text{ mg-M} \cdot \text{mg-x}^{-1}$                       |
| $Y_M$         | the mediator yield                                                 | $6.14 \text{ mg-M} \cdot \text{mg-S}^{-1}$                       |
| $\gamma$      | Mediator molar mass                                                | $663,400 \text{ mg-M} \cdot \text{mol}_{mediator}^{-1}$          |
| $n_e$         | Electrons transferred per mol of mediator                          | $2 \text{ mole}^{-1} \cdot \text{mol}_{mediator}^{-1}$           |
| $F$           | Faraday constant                                                   | $96,485 \text{ A} \cdot \text{s} \cdot \text{mole}^{-1}$         |
| $d$           | the membrane salt transfer coefficient                             | $0.029 \text{ day}^{-1}$                                         |
| $k_r$         | Parameter in Eq.13 & 15                                            | $0.082 \text{ L} \cdot \text{mg-a}^{-1}$                         |
| $R$           | Ideal gas constant                                                 | $8.314472 \text{ J} \cdot \text{K}^{-1} \cdot \text{mol}^{-1}$   |
| $T$           | MDC temperature                                                    | $298.15 \text{ K}$                                               |

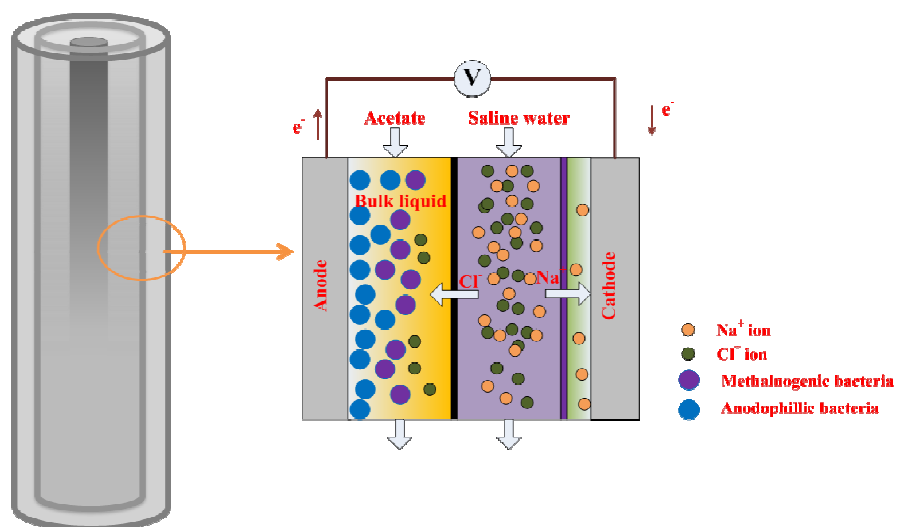

**Figure S1.** Schematic diagram of a tubular microbial desalination cell

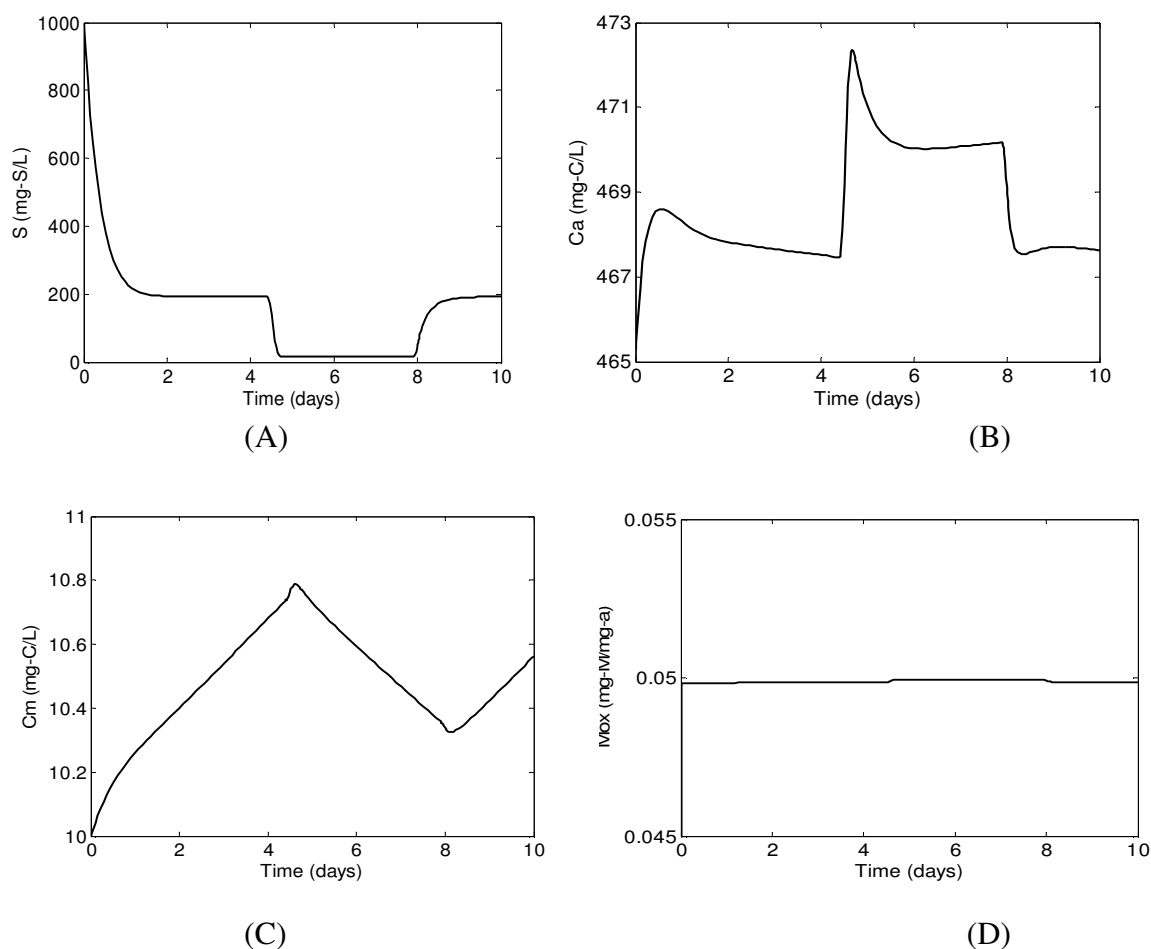

**Figure S2.** The simulation results when the anode influent feeding rate was changed from 0.5 to 0.2, and then back to 0.5  $\text{mL} \cdot \text{min}^{-1}$ : A) substrate concentration, B) the concentration of anodophilic microorganisms, C) the concentration of methanogenic microorganisms, and D) the oxidized mediator fraction per anodophilic microorganism.

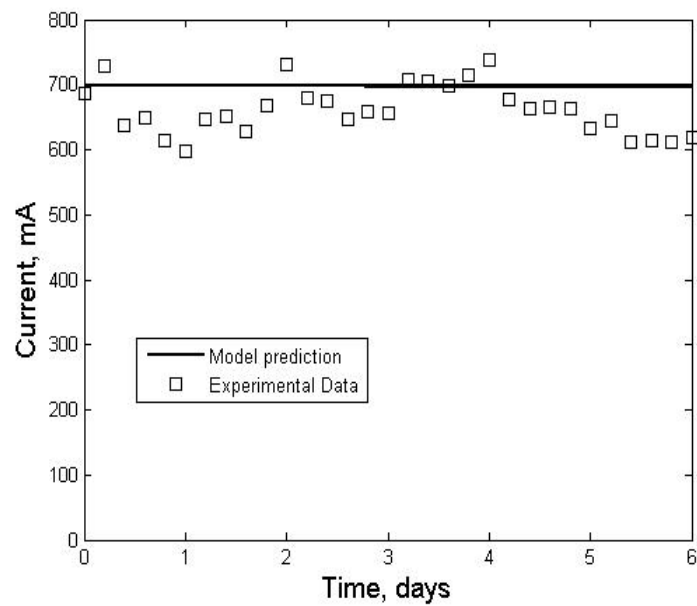

**Figure S3.** Experimental data and model prediction of the current generation of the large-scale MDC system

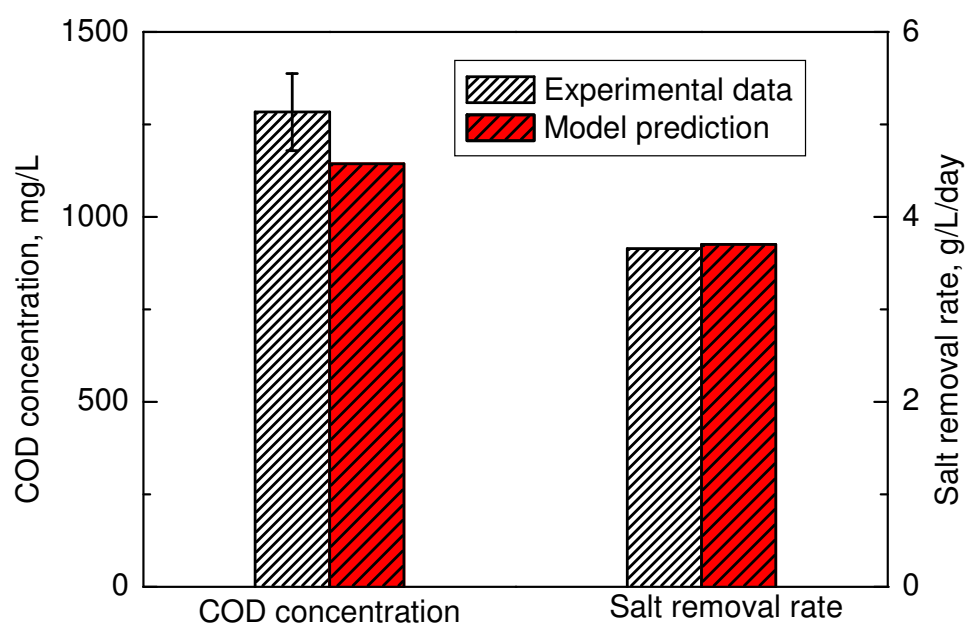

**Figure S4.** Experimental data and model prediction of the anode effluent COD concentration and salt removal rate of the large-scale MDC system



## References

1. Jacobson, K. S.; Drew, D.; He, Z., Use of a liter-scale microbial desalination cell as a platform to study bioelectrochemical desalination with salt solution or artificial seawater. *Environ. Sci. Technol.* **2011**, *45*, 4652-4657.
2. Wang, X.; Cheng, S.; Feng, Y.; Merrill, M. D.; Saito, T.; Logan, B. E., Use of carbon mesh anodes and the effect of different pretreatment methods on power production in microbial fuel cells. *Environ. Sci. Technol.* **2009**, *43*, 6870-6874.
3. Zhang, F.; Ge, Z.; Grimaud, J.; Hurst, J.; He, Z., Long-term performance of liter-scale microbial fuel cells installed in a municipal wastewater treatment facility. *Environ. Sci. Technol.* **2013**, *47*, 4941-4948.
4. Angenent, L. T.; Sung, S., Development of anaerobic migrating blanket reactor (AMBR), a novel anaerobic treatment system. *Water Res.* **2001**, *35*, 1739-1747.
